# Supplementary material for: An Arylbenzofuran, Stilbene Dimers, and Prenylated Diels–Alder Adducts as Potent Diabetic Inhibitors from Morus bombycis Leaves
Source: MDPI journal article supplement (doi:10.3390/antiox12040837), 2023-03-30
Supplement: s1 [file s1]

## Supplementary Materials

# **An Arylbenzofuran, Stilbene Dimers and Prenylated Diels-Alder Adducts as Potent Diabetic Inhibitors from *Morus bombycis* Leaves**

Seon Min Ju<sup>1</sup>, Seung Mi Ko<sup>1</sup>, Jung Hye Ryu<sup>1</sup>, Md Yousof Ali<sup>2,3</sup>, Jae Sue Choi<sup>2, \*</sup>, Hyun Ah Jung<sup>1, \*</sup>

<sup>1</sup>Department of Food Science and Human Nutrition, Jeonbuk National University, Korea;

<sup>2</sup>Department of Food Science and Nutrition, Pukyong National University, Korea; <sup>3</sup>Department of Physiology and Pharmacology, Hotchkiss Brain Institute and Alberta Children's Hospital Research Institute, Cumming School of Medicine, University of Calgary, Calgary, AB T2N 4N1, Canada

Correspondence: choijs@pknu.ac.kr (J.S.C.); jungha@jbnu.ac.kr (H.A.J.); Tel.: +82-51-629-5845 (J.S.C.); +82-63-270-4882 (H.A.J.)

**Table S1.** Inhibitory activities of subfractions of EtOAc fraction from *Morus bombycis* leaves against peroxynitrite,  $\alpha$ -glucosidase, PTP1B and AGE formation

| <b>Subfractions</b>          | <b>Peroxyntirite<br/>IC<sub>50</sub> (μg/mL)<sup>a</sup></b> | <b><math>\alpha</math>-Glucosidase<br/>IC<sub>50</sub> (μg/mL)<sup>a</sup></b> | <b>PTP1B<br/>IC<sub>50</sub> (μg/mL)<sup>a</sup></b> | <b>BSA-AGEs<br/>IC<sub>50</sub> (μg/mL)<sup>a</sup></b> |
|------------------------------|--------------------------------------------------------------|--------------------------------------------------------------------------------|------------------------------------------------------|---------------------------------------------------------|
| E2                           | 1.23 ± 0.01                                                  | 249.58 ± 18.53                                                                 | 56.93 ± 4.46                                         | 6.12 ± 0.29                                             |
| E3                           | < 0.032                                                      | 10.22 ± 2.29                                                                   | 25.11 ± 4.46                                         | 14.65 ± 1.50                                            |
| E4                           | 0.13 ± 0.02                                                  | 5.11 ± 1.87                                                                    | 14.28 ± 5.46                                         | 4.19 ± 0.37                                             |
| E6                           | 0.34 ± 0.01                                                  | 1.30 ± 0.08                                                                    | 4.65 ± 0.56                                          | 3.58 ± 0.24                                             |
| E8                           | 1.04 ± 0.09                                                  | 0.77 ± 0.03                                                                    | 4.86 ± 1.40                                          | 4.60 ± 0.05                                             |
| L-Penicillamine <sup>b</sup> | 0.67 ± 0.01                                                  |                                                                                | 5.60 ± 0.77                                          |                                                         |
| Acarbose <sup>b</sup>        |                                                              | 224.27 ± 4.82                                                                  |                                                      |                                                         |
| Ursolic acid <sup>b</sup>    |                                                              |                                                                                | 6.39 ± 0.42                                          |                                                         |
| Aminoguanidine <sup>b</sup>  |                                                              |                                                                                |                                                      | 36.73 ± 1.64                                            |

<sup>a</sup>The values are expressed as the mean ± SD of triplicate experiments. <sup>b</sup>Positive control was used in each assay

**Table S2. The 1D NMR data of compounds 4 and 6**

| Macrourin B ( <b>4</b> ) |                                               |       | Austrafrican C ( <b>6</b> ) |                                                 |       |
|--------------------------|-----------------------------------------------|-------|-----------------------------|-------------------------------------------------|-------|
| Position                 | H                                             | C     | Position                    | H                                               | C     |
| 2                        |                                               | 156.5 | 2                           |                                                 | 157.3 |
| 3                        | 6.43 (br s, $J=0.15\text{Hz}$ )               | 100.3 | 3                           | 6.90 (1H, s)                                    | 102.1 |
| 3a                       |                                               | 119.4 | 3a                          |                                                 | 124.1 |
| 4                        |                                               | 121.6 | 4                           | 7.07 (1H, s)                                    | 107.8 |
| 5                        |                                               | 133.8 | 5                           |                                                 | 142.9 |
| 6                        |                                               | 141.1 | 6                           |                                                 | 143.9 |
| 7                        | 6.90 (s)                                      | 98.5  | 7                           | 7.09 (1H, s)                                    | 99.8  |
| 7a                       |                                               | 152.5 | 7a                          |                                                 | 151.2 |
| 8                        |                                               | 146.2 | 1'                          |                                                 | 133.7 |
| 9                        | 6.65 (d, $J=2\text{Hz}$ )                     | 103.8 | 2'                          | 6.77 (d, $J=2.5\text{ Hz}$ )                    | 104   |
| 10                       |                                               | 159.8 | 3'                          |                                                 | 160   |
| 11                       | 6.19 (t, $J=3.2\text{Hz}$ )                   | 103.4 | 4'                          | 6.25 (t, $J=2.3\text{ Hz}$ )                    | 103.7 |
| 12                       |                                               | 159.8 | 5'                          |                                                 | 160   |
| 13                       | 6.65 (d, $J=2\text{Hz}$ )                     | 103.8 | 6'                          | 6.78 (d, $J=2.5\text{ Hz}$ )                    | 104   |
| 1'                       |                                               | 119.5 | 1''                         |                                                 | 116   |
| 2'                       |                                               | 157.5 | 2''                         |                                                 | 157.7 |
| 3'                       | 6.33 (d, $J=2.5\text{Hz}$ )                   | 103.6 | 3''                         | 6.18 (d, $J=2.3\text{ Hz}$ )                    | 103.4 |
| 4'                       |                                               | 159.4 | 4''                         |                                                 | 159.7 |
| 5'                       | 6.27 (dd, $J=8.4\text{Hz}$ , $2.3\text{Hz}$ ) | 107.5 | 5''                         | 6.27 (dd, $J=8.4\text{ Hz}$ , $2.3\text{ Hz}$ ) | 108   |
| 6'                       | 7.10 (d, $J=8.5\text{Hz}$ )                   | 129.3 | 6''                         | 7.04 (d, $J=8.5\text{ Hz}$ )                    | 131   |
| 7'                       | 5.78 (d, $J=7.5\text{Hz}$ )                   | 90.9  | 7''                         | 5.23 (d, $J=8\text{Hz}$ )                       | 76.3  |
| 8'                       | 4.74 (d, $J=7\text{Hz}$ )                     | 57    | 8''                         | 5.07 (d, $J=7.6\text{Hz}$ )                     | 81    |
| 9'                       |                                               | 145.9 | 9''                         |                                                 | 140.5 |
| 10'                      | 6.23 (d, $J=2.5\text{Hz}$ )                   | 107.7 | 10''                        | 6.22 (d, $J=2.3\text{Hz}$ )                     | 107.5 |
| 11'                      |                                               | 159.5 | 11''                        |                                                 | 159   |
| 12'                      | 6.17 (t, $J=4.6\text{Hz}$ )                   | 102.2 | 12''                        | 6.13 (t, $J=2.3\text{ Hz}$ )                    | 103.4 |
| 13'                      |                                               | 159.5 | 13''                        |                                                 | 159   |
| 14'                      | 6.23 (d, $J=2.5\text{Hz}$ )                   | 107.7 | 14''                        | 6.22 (d, $J=2.3\text{Hz}$ )                     | 107.5 |

**Table S3. The 1D NMR data of compounds 7 and 8**

| Mulberrofuran F ( <b>7</b> ) |                                 |       | Chalcomoracin ( <b>8</b> ) |                                               |       |
|------------------------------|---------------------------------|-------|----------------------------|-----------------------------------------------|-------|
| Position                     | H                               | C     | Position                   | H                                             | C     |
| 2                            |                                 | 155.4 | 2                          |                                               | 156.4 |
| 3                            | 6.91 (d, $J=1\text{Hz}$ )       | 102.3 | 3                          | 6.91 (d, $J=2\text{Hz}$ , overlapping)        | 101.8 |
| 3a                           |                                 | 123.1 | 3a                         |                                               | 122.6 |
| 4                            | 7.32 (d, $J=8.5\text{Hz}$ )     | 122   | 4                          | 7.34 (d, $J=8.5\text{Hz}$ )                   | 121.8 |
| 5                            | 6.71 (dd, $J=8\text{Hz}$ )      | 113.7 | 5                          | 6.76 (m, overlapping)                         | 113.1 |
| 6                            |                                 | 156.9 | 6                          |                                               | 157.8 |
| 7                            | 6.88 (d, $J=1.7\text{Hz}$ )     | 98.5  | 7                          | 6.91 (d, $J=2\text{Hz}$ , overlapping)        | 98.3  |
| 7a                           |                                 | 156.9 | 7a                         |                                               | 155.4 |
| 1'                           |                                 | 131.5 | 1'                         |                                               | 130.9 |
| 2'                           | 6.87 (d, $J=3.4\text{Hz}$ )     | 106   | 2'                         | 6.76 (m, overlapping)                         | 104.8 |
| 3'                           |                                 | 154   | 3'                         |                                               | 156.5 |
| 4'                           |                                 | 113.3 | 4'                         |                                               | 115.9 |
| 5'                           |                                 | 158.3 | 5'                         |                                               | 156.5 |
| 6'                           | (m, solvent overlapping)        | 105.2 | 6'                         | 6.76 (m, overlapping)                         | 104.9 |
| 1''                          |                                 | 134.1 | 1''                        |                                               | 133.8 |
| 2''                          | 6.41 (br d, $J=5.5\text{Hz}$ )  | 123   | 2''                        | 5.77 (br s)                                   | 124.3 |
| 3''                          | (m, solvent overlapping)        | 35.9  | 3''                        | 4.11 (br s)                                   | 33.1  |
| 4''                          | (m, solvent overlapping)        | 38    | 4''                        | 4.63 (t, $J=4.20\text{ Hz}$ )                 | 47.8  |
| 5''                          | (m, solvent overlapping)        | 29.1  | 5''                        | 3.75 (t, $J=5.7\text{ Hz}$ )                  | 36.5  |
| 6''                          | 2.69 (dd, $J=15\text{Hz}$ )     | 36.5  | 6''                        | 2.18 (d, $J=18.5\text{Hz}$ )                  | 32.2  |
| 6b''                         | 2.06 (dd, $J=15\text{Hz}$ )     |       | 6b''                       | 2.50 (d, $J=18\text{Hz}$ )                    | 32.2  |
| 7''                          | 1.73 (s)                        | 23.9  | 7''                        | 1.93 (br s)                                   | 23.8  |
| 8''                          |                                 | 104.2 | 8''                        |                                               | 209.8 |
| 9''                          |                                 | ND    | 9''                        |                                               | 113.4 |
| 10''                         |                                 | 155.6 | 10''                       |                                               | 164.6 |
| 11''                         |                                 | 117.8 | 11''                       |                                               | 116.6 |
| 12''                         |                                 | 157.3 | 12''                       |                                               | 164.2 |
| 13''                         | 6.23 (d, $J=8.5\text{Hz}$ )     | 107.4 | 13''                       | 6.43 (d, $J=9\text{Hz}$ )                     | 108.1 |
| 14''                         | 7.11 (d, $J=8.5\text{Hz}$ )     | 128   | 14''                       | 8.43 (d, $J=8.5\text{Hz}$ )                   | 132.1 |
| 15''                         |                                 | 117.8 | 15''                       |                                               | 121.9 |
| 16''                         |                                 | 157.3 | 16''                       |                                               | 156.6 |
| 17''                         | 6.36 (1H, d, $J=2.5\text{Hz}$ ) | 104.2 | 17''                       | 6.50 (d, $J=2\text{Hz}$ )                     | 103.5 |
| 18''                         |                                 | 157   | 18''                       |                                               | 157.9 |
| 19''                         | 6.46 (dd, $J=8.5\text{Hz}$ )    | 110.5 | 19''                       | 6.30 (dd, $J=8.4\text{Hz}$ , $2.3\text{Hz}$ ) | 107.5 |
| 20''                         | 7.00 (d, $J=9\text{Hz}$ )       | 126.3 | 20''                       | 7.00 (d, $J=8\text{Hz}$ )                     | 128.7 |
| 21''                         | 2.99-2.95 (m)                   | 23.2  | 21''                       | 3.25 (d, $J=7.5\text{Hz}$ )                   | 22.2  |
| 22''                         | 5.16 (m)                        | 124.1 | 22''                       | 5.14 (t, $J=7.25\text{Hz}$ )                  | 123.1 |
| 23''                         |                                 | 131.9 | 23''                       |                                               | 131.5 |
| 24''                         | 1.80 (s)                        | 25.9  | 24''                       | 1.70 (s)                                      | 25.8  |
| 25''                         | 1.56 (s)                        | 17.9  | 25''                       | 1.56 (s)                                      | 17.8  |

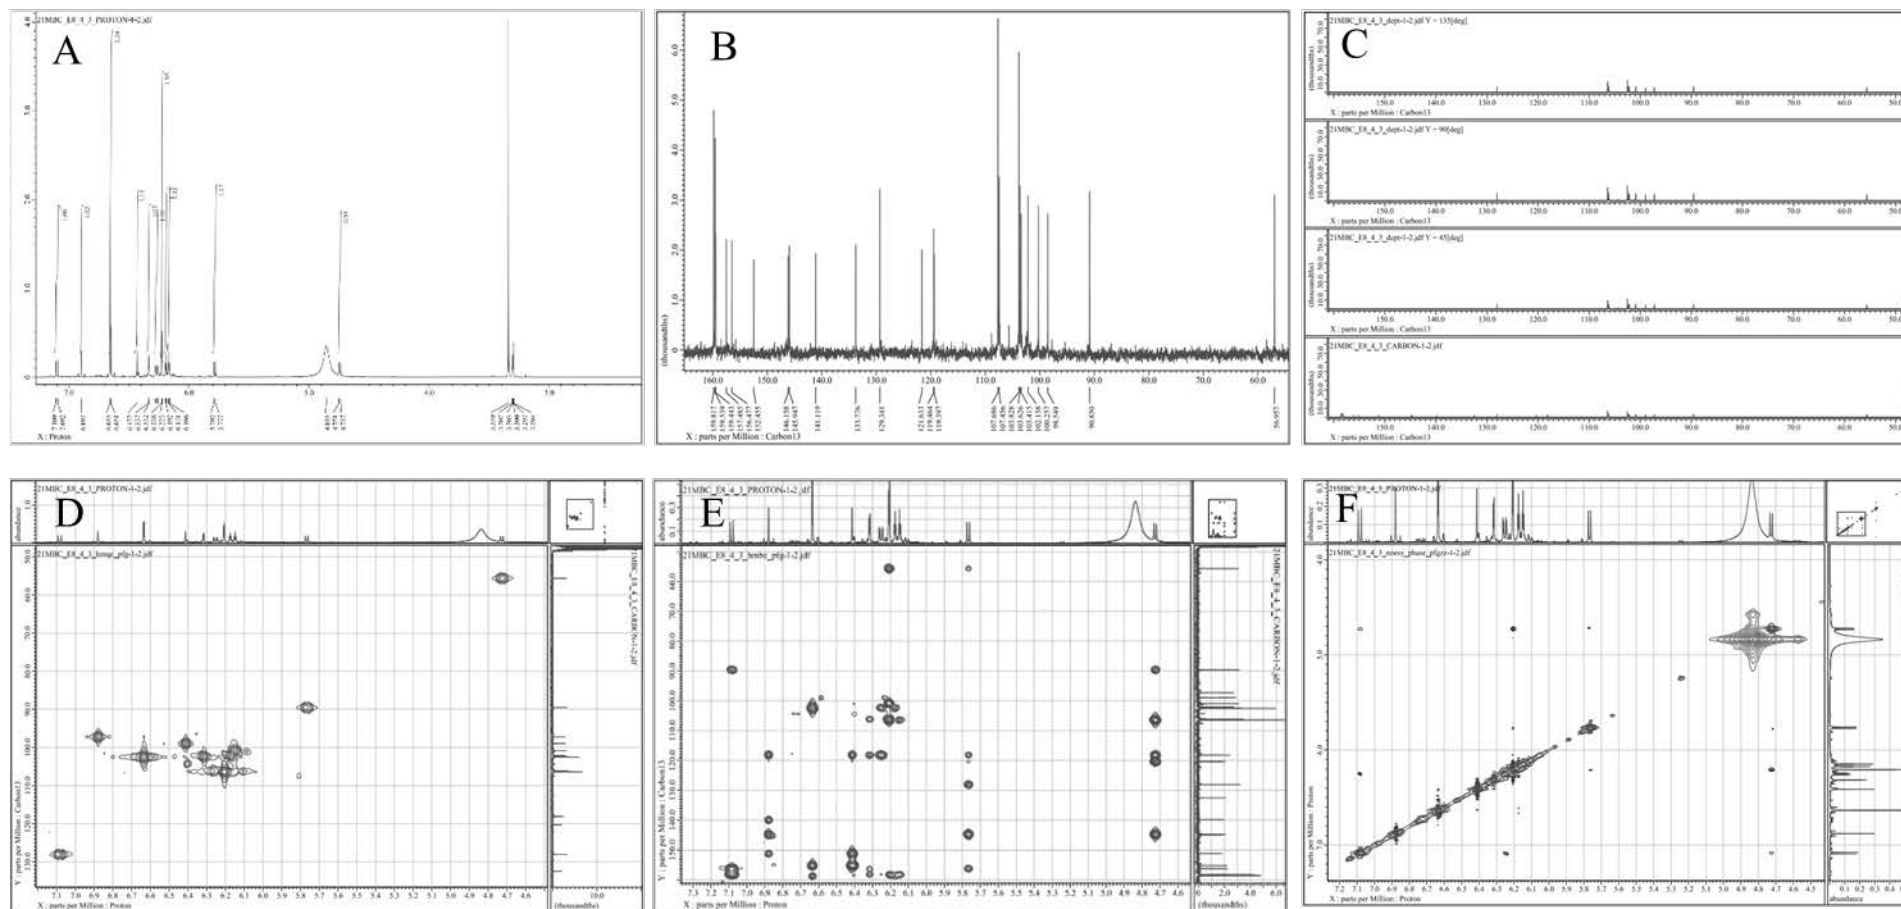

**Figure S1. The NMR chromatograms of compounds 4**

A:  $^1\text{H}$  NMR; B:  $^{13}\text{C}$  NMR; C: DEPT; D: HMQC; E: HMBC; F: NOESY (dissolved in MeOH- $d_4$ )



**Table S4. The 1D NMR data of compounds 1- 3**

|                                                                                                                                                                                                                                                                                                                                                                                                                                                                                                                                                                                                                                                                                                                                                                                                                                                         |
|---------------------------------------------------------------------------------------------------------------------------------------------------------------------------------------------------------------------------------------------------------------------------------------------------------------------------------------------------------------------------------------------------------------------------------------------------------------------------------------------------------------------------------------------------------------------------------------------------------------------------------------------------------------------------------------------------------------------------------------------------------------------------------------------------------------------------------------------------------|
| <i>p</i> -Coumaric acid ( <b>1</b> )                                                                                                                                                                                                                                                                                                                                                                                                                                                                                                                                                                                                                                                                                                                                                                                                                    |
| <sup>1</sup> H NMR: (500 MHz, MeOH- <i>d</i> <sub>4</sub> ) δ <sub>H</sub> 7.52 (d, <i>J</i> = 16Hz, 1H, H-7), 7.41 (d, <i>J</i> = 8.5Hz, 2H, H-2, 6), 6.77 (d, <i>J</i> = 8.5Hz, 2H, H-3, 5), 6.29 (d, <i>J</i> = 16Hz, 1H, H-8); <sup>13</sup> C NMR: (125 MHz, MeOH- <i>d</i> <sub>4</sub> ) δ <sub>C</sub> 172.5 (C-9), 160.7 (C-4), 145.2 (C-7), 130.8 (C-2, 6), 127.2 (C-1), 117.6 (C-8), 116.7 (C-3, 5).                                                                                                                                                                                                                                                                                                                                                                                                                                         |
| Chlorogenic acid methyl ester ( <b>2</b> )                                                                                                                                                                                                                                                                                                                                                                                                                                                                                                                                                                                                                                                                                                                                                                                                              |
| <sup>1</sup> H NMR: (500 MHz, MeOH- <i>d</i> <sub>4</sub> ) δ <sub>H</sub> 7.51 (d, <i>J</i> = 15.5Hz, 1H, H-7'), 7.03 (d, <i>J</i> = 1.9Hz, 1H, H-2'), 6.94 (dd, <i>J</i> = 10.3Hz, 1H, H-6'), 6.77 (d, <i>J</i> = 8Hz, 1H, H-5'), 6.21 (d, <i>J</i> = 16Hz, 1H, H-8'), 5.27 (dd, <i>J</i> = 11.3Hz, 1H, H-3), 4.12 (br d, 1H, H-5), 3.72 (dd, <i>J</i> = 7.6Hz, 1H, H-4), 3.68 (s, 3H, COOCH <sub>3</sub> ), 2.20 (dd, <i>J</i> = 13.5Hz, 1H, H-2a), 2.16 (m, 2H, H-2b, 6a), 2.00 (br d, <i>J</i> = 13.5Hz, 1H, H-6b); <sup>13</sup> C NMR: (125 MHz, MeOH- <i>d</i> <sub>4</sub> ) δ <sub>C</sub> 174.1 (C-7), 167 (C-9'), 148.4 (C-4'), 145.9 (C-7'), 145.5 (C-3'), 126.3 (C-1'), 121.6 (C-6'), 115.2 (C-5'), 113.8 (C-2'), 113.7 (C-8'), 74.5 (C-1), 71.2 (C-4), 70.8 (C-3), 69 (C-5), 51.6 (OCH <sub>3</sub> ), 36.7 (C-6a, 6b), 36.4 (C-2a, 2b). |
| Oxyresveratrol ( <b>3</b> )                                                                                                                                                                                                                                                                                                                                                                                                                                                                                                                                                                                                                                                                                                                                                                                                                             |
| <sup>1</sup> H NMR (500 MHz, MeOH- <i>d</i> <sub>4</sub> ) δ <sub>H</sub> 7.32 (d, <i>J</i> = 9Hz, 1H, H-6), 7.26 (d, <i>J</i> = 16Hz, 1H, H-β), 6.80 (d, <i>J</i> = 16.5Hz, 1H, H-α), 6.44 (d, <i>J</i> = 2Hz, 2H, H-2', 6'), 6.31-6.29 (m, 2H, H-3, 5), 6.13 (t, <i>J</i> = 2Hz, 1H, H-4'); <sup>13</sup> C NMR: (125 MHz, MeOH- <i>d</i> <sub>4</sub> ) δ <sub>C</sub> 158.2 (C-5', 3'), 157.9 (C-4), 156 (C-2), 140.9 (C-1') 127.1 (C-6), 125.3 (C-β), 123.6 (C-α), 116.5 (C-1), 107.1 (C-5), 104.3 (C-2', 6'), 102.2 (C-3), 101 (C-4').                                                                                                                                                                                                                                                                                                            |
